# Supplementary material
Source: HighWire-hosted journal article supplement (https://drc.bmj.com/content/7/1/e000717)

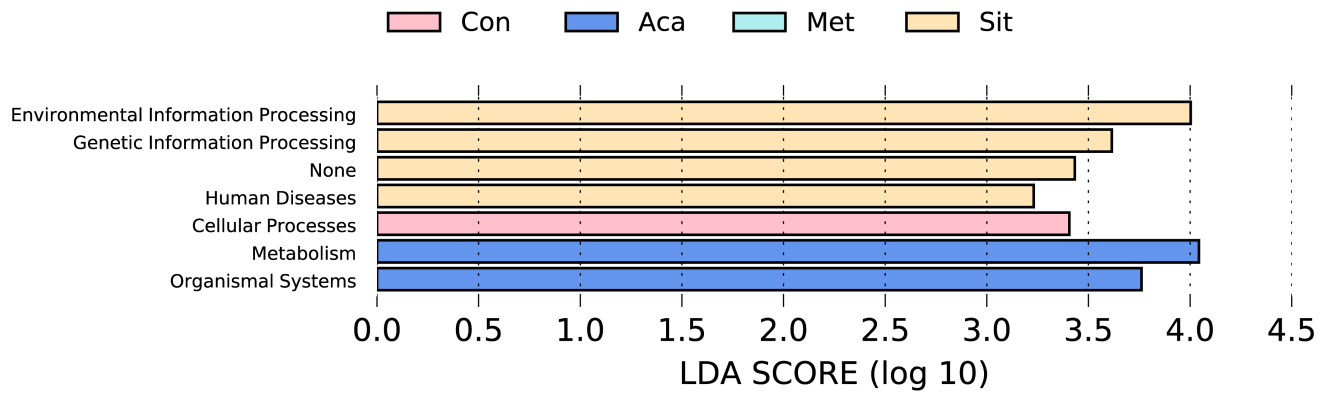

B Level 2

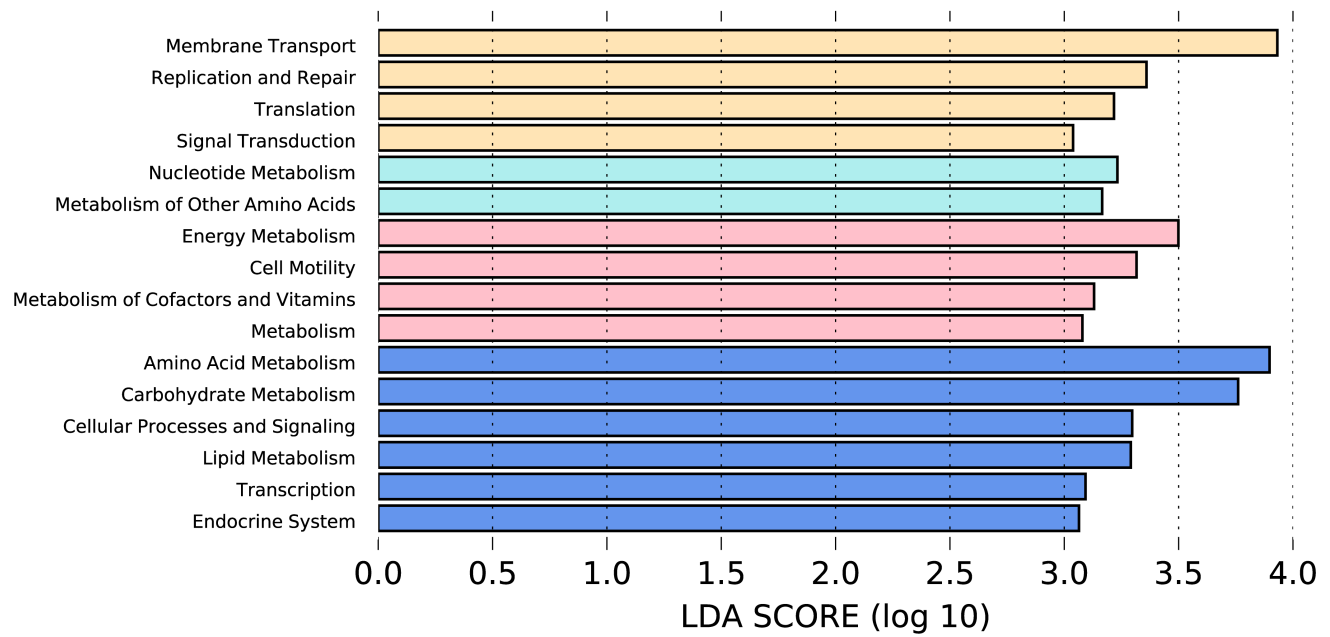

C Level 3

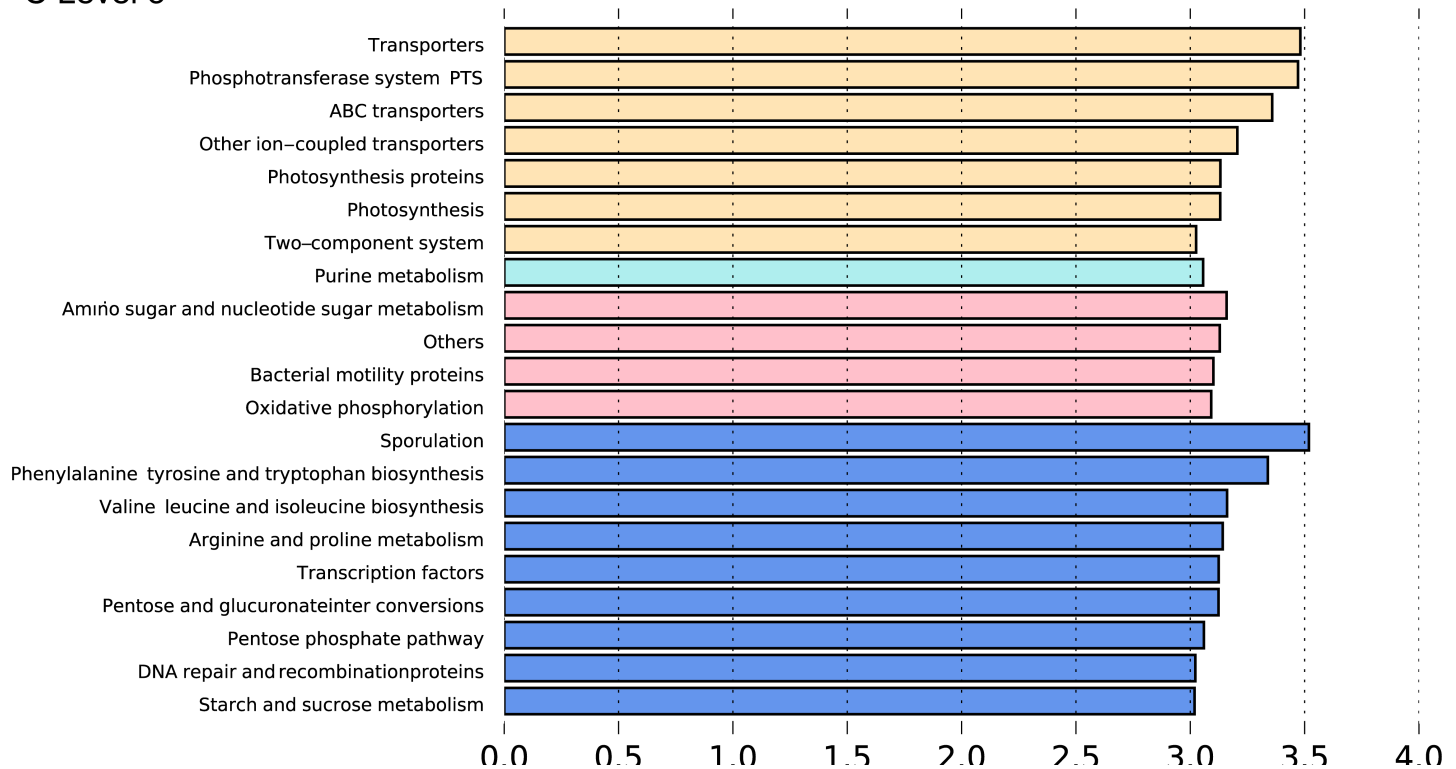

Fig. S4

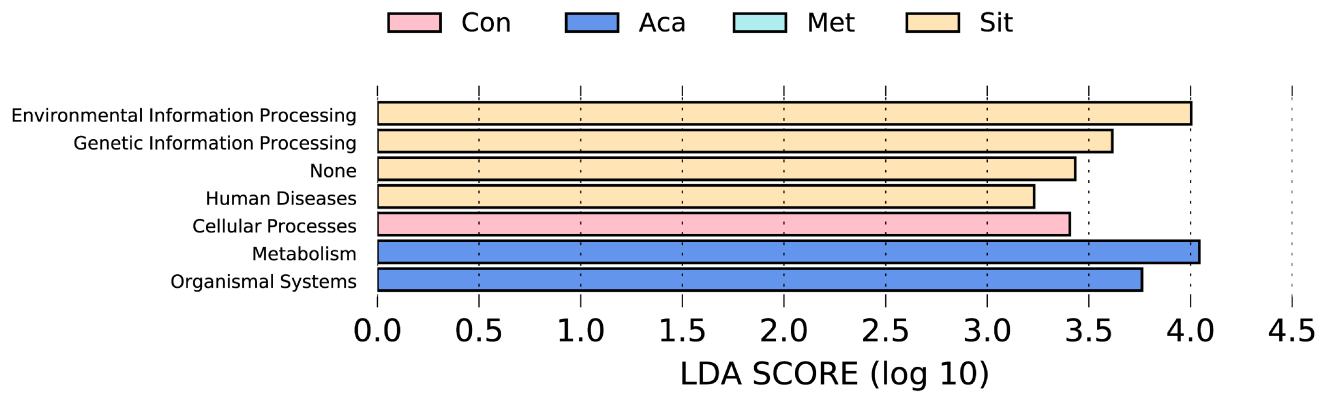

B Level 2

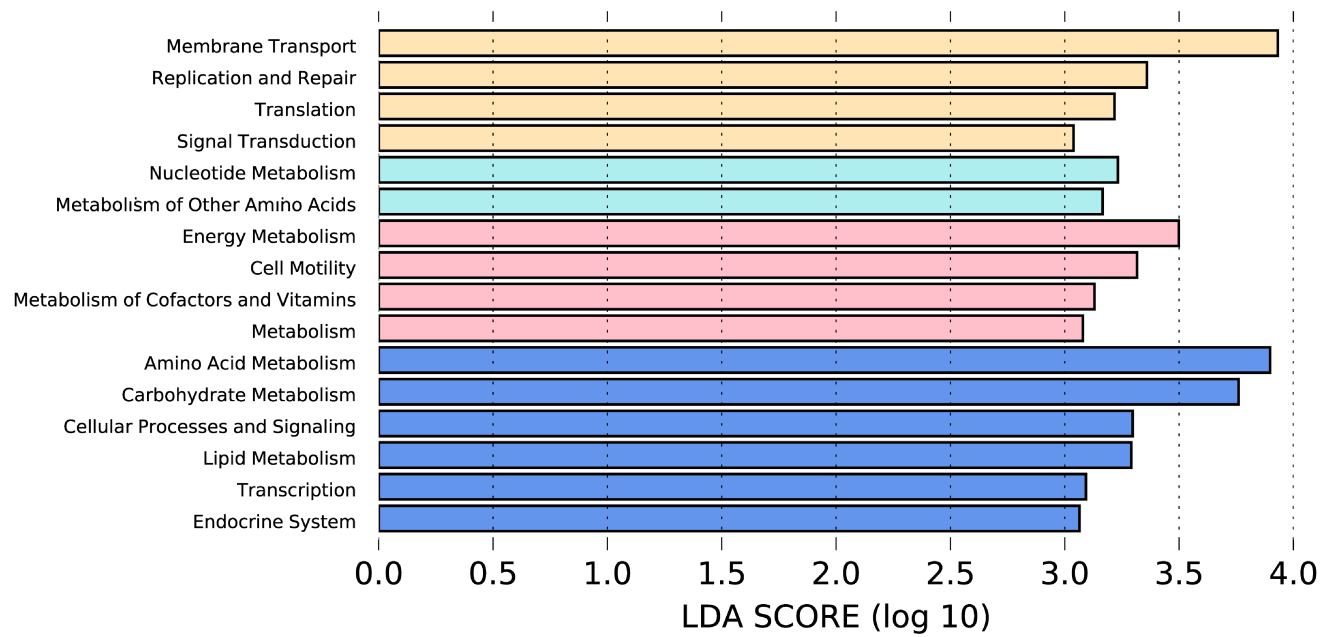

C Level 3

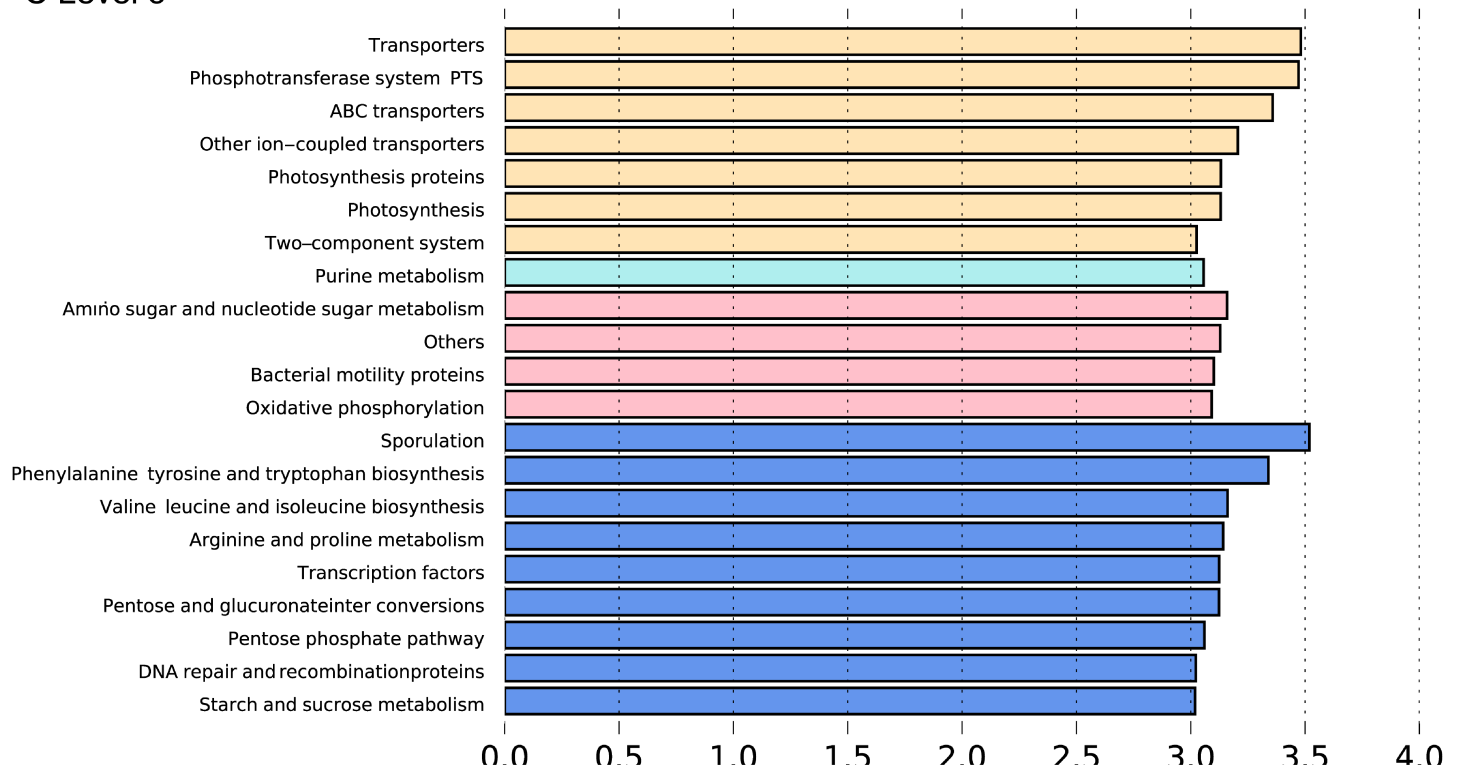

Supplement: inline-supplementary-material-4 [file inline-supplementary-material-4.pdf]
